# Supplementary material
Source: PubMed Central journal article supplement (PMC9380554)
Supplement: aac.00052-22-s0001.pdf [file aac.00052-22-s0001.pdf]

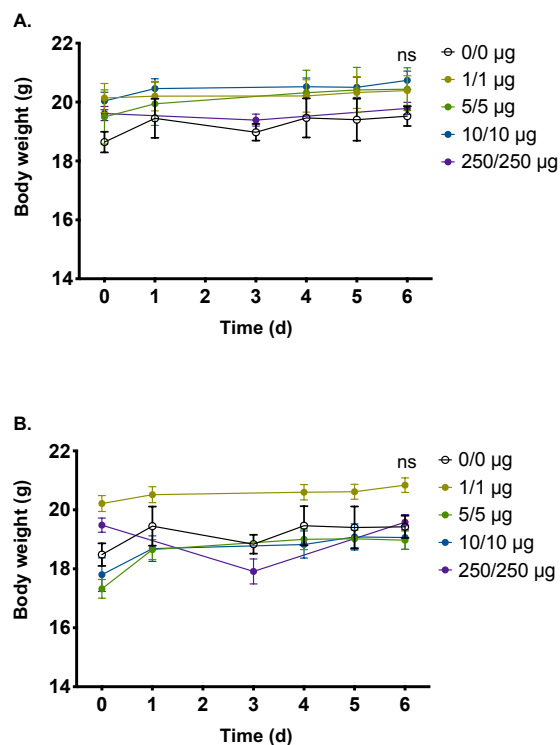

**Fig S1.** Intratracheal GH therapy is well tolerated by mice. Body weight of BALB/c mice following intratracheal administration of a single dose of (A) PslGH/PelA<sub>h</sub> or (B) PslGH/Ega3<sub>h</sub>. ns indicates no significant difference in the change in body weight of mice treated with 250/250  $\mu\text{g}$  combination GHs relative to buffer-treated mice as determined by two-way ANOVA with Dunnett's multiple-comparison test.

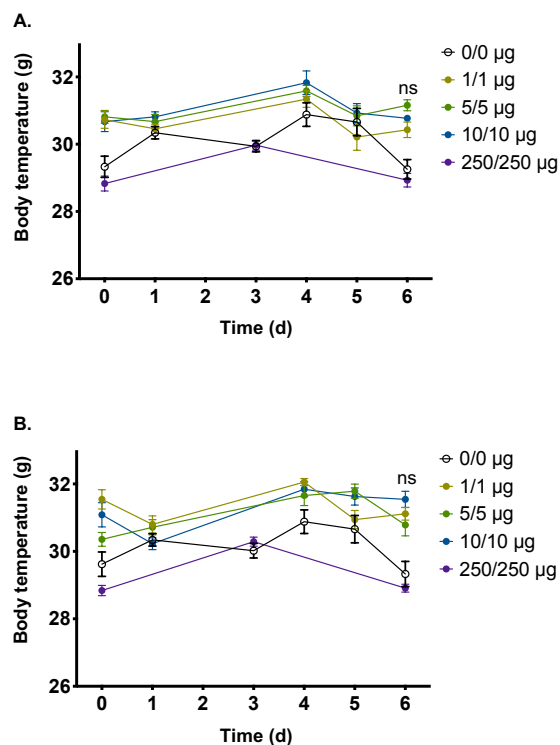

**Fig S2.** Intratracheal GH therapy is well tolerated by mice. Body temperature of BALB/c mice following administration of a single dose of (A) PsIG<sub>h</sub>/PelA<sub>h</sub> or (B) PsIG<sub>h</sub>/Ega3<sub>h</sub>. ns indicates no significant difference in the change in body temperature of mice treated with 250/250 µg combination GHs relative to buffer-treated mice as determined by two-way ANOVA with Dunnett's multiple-comparison test.

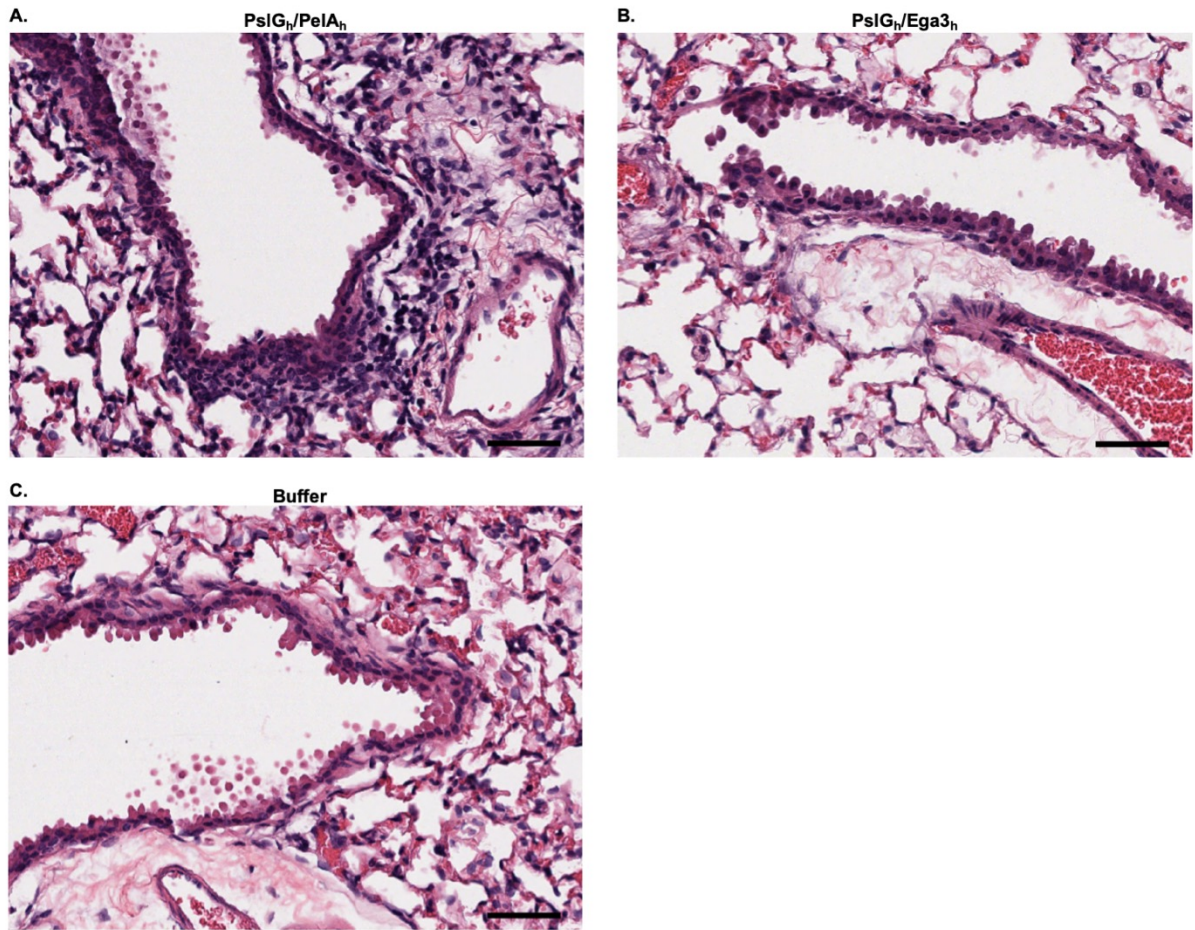

**Fig S3.** Intratracheal GH therapy is well tolerated by mice. Haematoxylin- and eosin-stained sections of lungs obtained from immunocompetent BALB/c mice 6 d after intratracheal administration of a single dose of 250/250 μg of (A) PsIG<sub>h</sub>/PelA<sub>h</sub>, (B) PsIG<sub>h</sub>/Ega3<sub>h</sub> or (C) PBS. Representative images from groups of ≥2 mice imaged at 40X (scale bar, 50 μm).

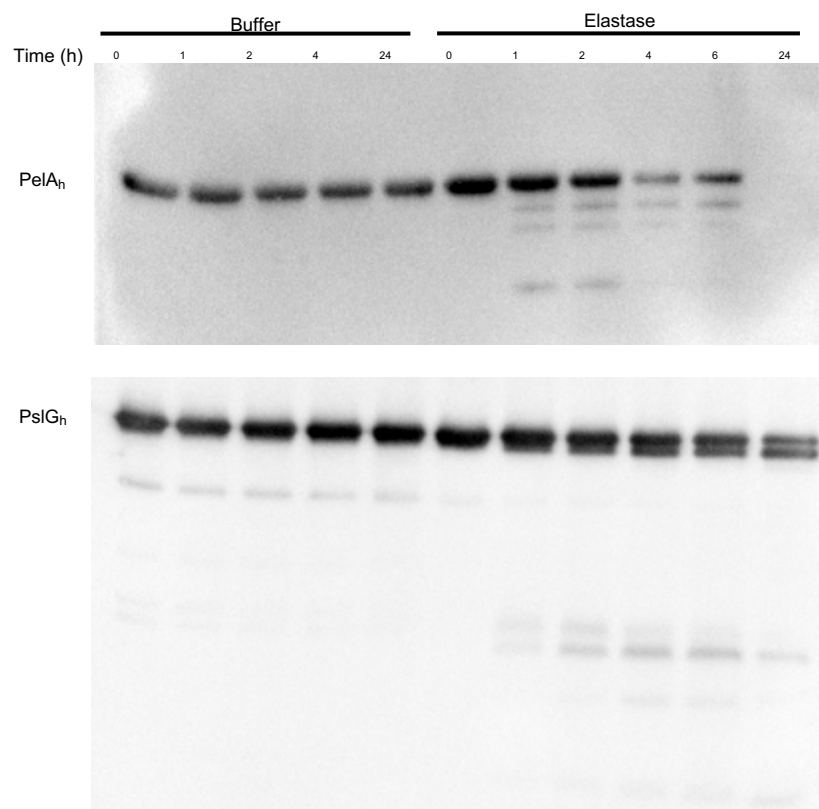

**Fig S4.** GHs are susceptible to degradation by elastase. 10  $\mu$ g PelAh or PslGh was treated with 100  $\mu$ g/mL neutrophil elastase in vitro for the indicated time intervals, and the integrity of the protein analyzed by Western blot.

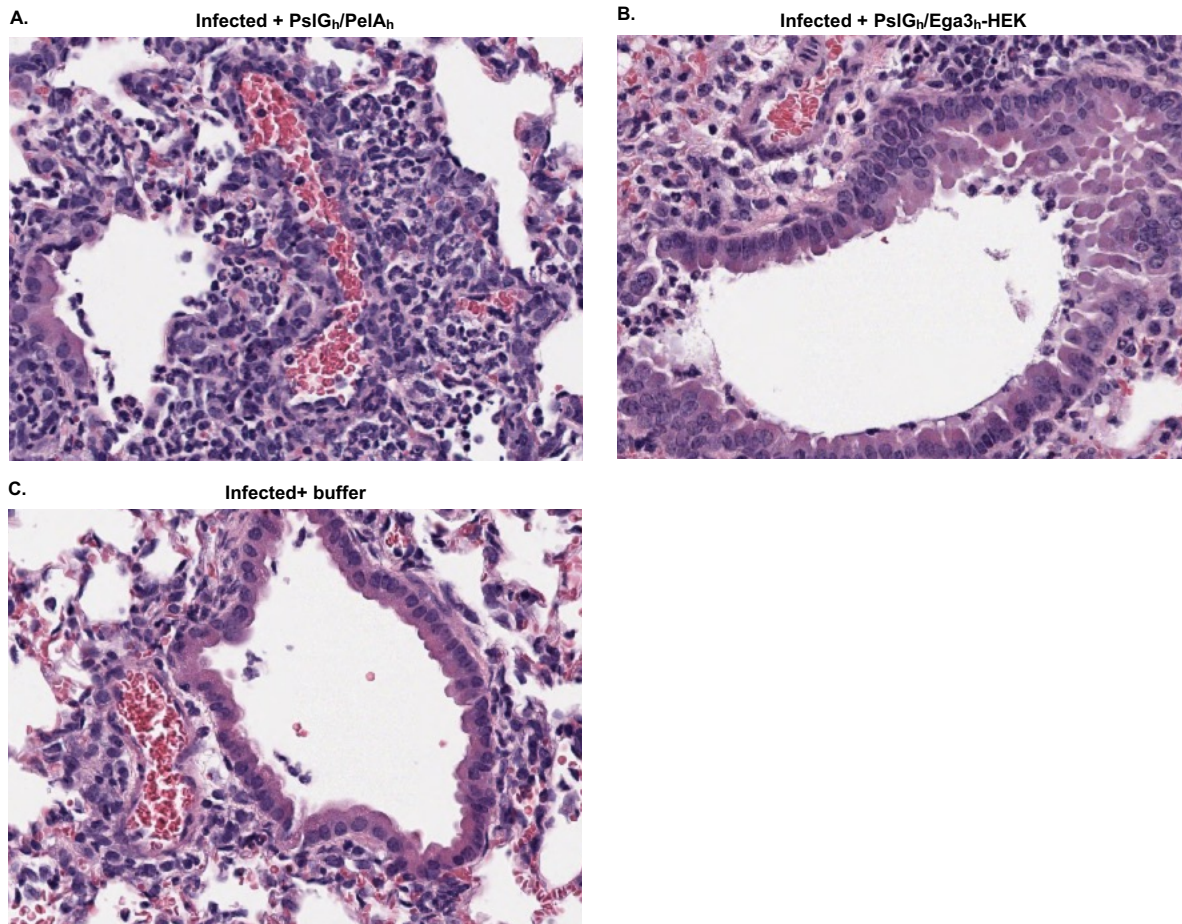

**Fig S5. Pulmonary histopathology of mice infected with *P. aeruginosa* and treated with GH enzymes.** Haematoxylin- and eosin-stained sections of lungs obtained from immunocompetent BALB/c mice 24 h after intratracheal infection with  $3 \times 10^7$  *P. aeruginosa* and co-administration of a single dose of 250/250  $\mu$ g of (A) PsIG<sub>h</sub>/PelA<sub>h</sub>, (B) PsIG<sub>h</sub>/Ega3<sub>h</sub>-HEK or (C) PBS. Representative images from groups of  $\geq 2$  mice imaged at 40X (scale bar, 50  $\mu$ m).

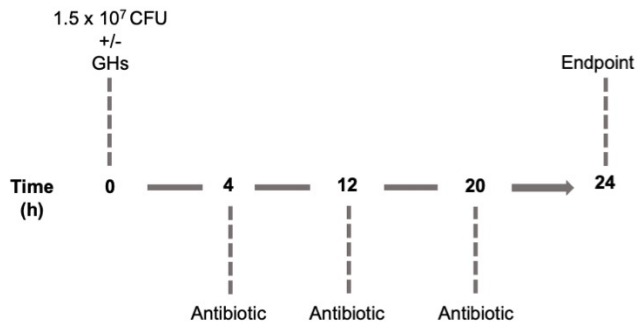

**Fig S6.** Experimental design of combination GH-antibiotic evaluation in a mouse model of acute *P. aeruginosa* pulmonary infection. Mice were intratracheally infected with  $1.5 \times 10^7$  *P. aeruginosa* CFU and co-administered with or without a single dose of 250/250  $\mu$ g PslG<sub>h</sub>/PelA<sub>h</sub> or PslG<sub>h</sub>/Ega3<sub>h</sub>-HEK then treated by intraperitoneal injection with 10 mg/mL ciprofloxacin or subcutaneous injection with 25 mg/mL ceftazidime beginning at 4 h every 8 h. Pulmonary and blood bacterial burden was measured 24 h after prophylaxis.
